# Supplementary material for: The role of kelp crabs as consumers in bull kelp forests—evidence from laboratory feeding trials and field enclosures
Source: PeerJ. 2017 May 25;5:e3372. doi: 10.7717/peerj.3372 (PMC5446772; doi:10.7717/peerj.3372)
Supplement: Supplemental Information 2 — Raw data used for analysis, Figs. 1 and 2. [file peerj-05-3372-s002.xlsx]

## Sheet: Nereo-Sacc-Ala
Crab	Treatment	Mass - start	Mass - end
3	Nereocystis	23.527	21.323
4	Nereocystis	22.772	21.016
5	Nereocystis	29.009	12.167
6	Nereocystis	24.47	11.614
7	Nereocystis	23.719	20.551
8	Nereocystis	17.828	16.558
9	Nereocystis	18.203	9.094
3	Saccharina	24.866	24.726
4	Saccharina	14.992	14.796
5	Saccharina	16.828	17.453
6	Saccharina	18.809	18.753
7	Saccharina	29.331	25.844
8	Saccharina	21.046	20.968
9	Saccharina	26.654	25.92
3	Alaria	11.83	11.985
4	Alaria	9.142	8.66
5	Alaria	10.558	10.306
6	Alaria	12.882	12.85
7	Alaria	10.37	8.153
8	Alaria	13.68	13.644
9	Alaria	10.915	10.621

## Sheet: Nereo-Ulva-Cost
Crab	Treatment	Mass - start	Mass - end
1	Nereocystis	28.51	23.65
3	Nereocystis	21.32	15
4	Nereocystis	20.76	20.391
7	Nereocystis	27.85	22.02
8	Nereocystis	26.12	19.453
9	Nereocystis	26.06	25.405
10	Nereocystis	23.056	15.999
11	Nereocystis	23.27	17.856
12	Nereocystis	24.52	22.651
1	Ulva	3.314	1.965
3	Ulva	4.373	3.989
4	Ulva	3.96	3.863
7	Ulva	2.712	0.124
8	Ulva	2.691	0.097
9	Ulva	2.64	1.793
10	Ulva	2.402	1.263
11	Ulva	2.342	0.327
12	Ulva	2.903	1.326
1	Costaria	36.415	36.924
3	Costaria	28.27	26.777
4	Costaria	42.4	43.404
7	Costaria	41.36	40.905
8	Costaria	21.14	18.887
9	Costaria	29.48	29.61
10	Costaria	25.708	24.72
11	Costaria	30.088	30.767
12	Costaria	26.54	25.675

## Sheet: Nereo-Ulva-Mazz
Treatment	Crab	Mass - start	Mass - end
Ulva	1	5.249	3.573
Ulva	2	5.74	3.27
Ulva	3	2.905	2.644
Ulva	5	2.431	2.387
Ulva	6	4.293	2.413
Ulva	7	2.747	2.106
Ulva	8	4.369	0.231
Ulva	9	2.451	0.336
Ulva	10	6.081	3.609
Ulva	11	3.54	0.795
Nereocystis	1	18.245	4.239
Nereocystis	2	23.981	24.244
Nereocystis	3	13.233	7.37
Nereocystis	5	16.21	13.079
Nereocystis	6	27.829	28.359
Nereocystis	7	16.49	17.155
Nereocystis	8	10.846	9.292
Nereocystis	9	14.733	6.155
Nereocystis	10	18.791	19.449
Nereocystis	11	10.286	7.353
Mazzaella	1	8.278	8.185
Mazzaella	2	8.108	8.037
Mazzaella	3	5.678	5.737
Mazzaella	5	6.238	5.982
Mazzaella	6	8.392	8.525
Mazzaella	7	6.217	5.954
Mazzaella	8	11.423	11.009
Mazzaella	9	10.48	10.799
Mazzaella	10	11.395	11.108
Mazzaella	11	10.92	10.589

## Sheet: Browns
Treatment	Crab	Mass - start	Mass - end
Agarum	1	10.694	10.278
Agarum	2	12.915	12.643
Agarum	3	12.173	11.907
Agarum	4	12.692	12.655
Agarum	5	12.314	12.356
Agarum	6	11.149	11.118
Agarum	7	13.355	13.012
Agarum	8	12.915	12.759
Agarum	9	9.833	9.776
Agarum	10	11.247	11.118
Nereocystis	1	13.633	1.614
Nereocystis	2	15.815	7.897
Nereocystis	3	17.173	8.753
Nereocystis	4	20.549	15.51
Nereocystis	5	18.879	12.57
Nereocystis	6	16.731	14.616
Nereocystis	7	20.173	15.699
Nereocystis	8	13.473	8.171
Nereocystis	9	20.255	9.962
Nereocystis	10	17.749	15.383
Sargassum	1	13.088	11.416
Sargassum	2	11.613	11.526
Sargassum	3	9.228	8.933
Sargassum	4	10.977	10.755
Sargassum	5	9.753	9.327
Sargassum	6	6.89	5.933
Sargassum	7	6.216	6.013
Sargassum	8	11.087	10.95
Sargassum	9	11.927	11.478
Sargassum	10	9.404	9.076

## Sheet: Aged-Fresh
Treatment	Crab	Mass - start	Mass - end
Aged	1	15.961	15.642
Aged	2	25.681	25.557
Aged	3	21.08	21.233
Aged	5	15.055	13.877
Aged	6	14.213	14.035
Aged	7	29.022	28.224
Aged	8	26.424	26.051
Aged	9	23.706	17.048
Aged	10	22.778	22.501
Aged	11	19.408	18.808
Fresh	1	12.211	5.089
Fresh	2	17.059	6.31
Fresh	3	18.534	9.949
Fresh	5	14.83	15.395
Fresh	6	13.517	2.434
Fresh	7	24.771	21.99
Fresh	8	21.286	19.488
Fresh	9	21.785	12.11
Fresh	10	19.569	19.63
Fresh	11	12.68	3.437
