# Supplementary material for: The role of kelp crabs as consumers in bull kelp forests—evidence from laboratory feeding trials and field enclosures
Source: PeerJ. 2017 May 25;5:e3372. doi: 10.7717/peerj.3372 (PMC5446772; doi:10.7717/peerj.3372)
Supplement: Supplemental Information 3 — Raw control data used for analysis, Figs. 1 and 2. [file peerj-05-3372-s003.xlsx]

## Sheet: Nereo-Sacc-Alaria
Trial	Choice	Treatment	Mass-Start	Mass-End	Change	PercentChange
1	Choice	Nereo	20.822	21.186	-0.364	-1.74815
2	Choice	Nereo	29.238	30.258	-1.02	-3.48861
3	Choice	Nereo	22.573	22.79	-0.217	-0.961325
4	Choice	Nereo	18.862	19.458	-0.596	-3.15979
5	Choice	Nereo	18.153	18.49	-0.337	-1.85644
6	Choice	Nereo	18.935	19.453	-0.518	-2.73567
7	Choice	Nereo	18.199	19.062	-0.863	-4.74202
8	Choice	Nereo	17.798	18.249	-0.451	-2.53399
9	Choice	Nereo	16.6	17.353	-0.753	-4.53614
10	Choice	Nereo	27.7	28.5	-0.8	-2.88809
11	Choice	Nereo	30.4	31.1	-0.7	-2.30263
12	Choice	Nereo	28.4	29	-0.6	-2.11268
1	Choice	Saccharina	29.382	29.054	0.328	1.11633
2	Choice	Saccharina	26.845	27.042	-0.197	-0.733842
3	Choice	Saccharina	31.049	30.666	0.383	1.23353
4	Choice	Saccharina	29.669	29.674	-0.005	-0.0168526
5	Choice	Saccharina	21.09	21.316	-0.226	-1.0716
6	Choice	Saccharina	28.011	27.395	0.616	2.19914
7	Choice	Saccharina	24.02	24.035	-0.015	-0.062448
8	Choice	Saccharina	22.93	22.924	0.006	0.0261666
9	Choice	Saccharina	27.077	27.042	0.035	0.129261
10	Choice	Saccharina	20.4	20.8	-0.4	-1.96078
11	Choice	Saccharina	36.2	36.6	-0.4	-1.10497
12	Choice	Saccharina	14.8	15.1	-0.3	-2.02703
1	Choice	Alaria	10.933	10.581	0.352	3.21961
2	Choice	Alaria	7.716	7.53	0.186	2.41058
3	Choice	Alaria	13.432	13.321	0.111	0.826385
4	Choice	Alaria	10.97	10.964	0.006	0.0546946
5	Choice	Alaria	9.111	9.051	0.06	0.658545
6	Choice	Alaria	6.552	6.524	0.028	0.42735
7	Choice	Alaria	9.258	9.181	0.077	0.831713
8	Choice	Alaria	10.975	10.935	0.04	0.364465
9	Choice	Alaria	7.911	7.801	0.11	1.39047
10	Choice	Alaria	6.6	6.8	-0.2	-3.0303
11	Choice	Alaria	4.7	4.9	-0.2	-4.25532
12	Choice	Alaria	10	10.2	-0.2	-2

## Sheet: Nereo-Costaria-Ulva
Trial	Choice	Treatment	Mass-Start	Mass-End	Change	FractionalChange	PercentChange
1	Choice	Nereo	27.14	28.408	1.04672	0.0385675	3.85675
2	Choice	Nereo	22.64	23.23	1.02606	0.0453207	4.53207
3	Choice	Nereo	25.53	26.835	1.05112	0.0411718	4.11718
4	Choice	Nereo	22.003	22.487	1.022	0.0464481	4.64481
5	Choice	Nereo	25.608	26.366	1.0296	0.0402062	4.02062
6	Choice	Nereo	25.25	25.57	1.01267	0.0401059	4.01059
7	Choice	Nereo	26.64	27.483	1.03164	0.0387254	3.87254
8	Choice	Nereo	25.45	25.991	1.02126	0.040128	4.0128
9	Choice	Nereo	22.97	23.995	1.04462	0.0454777	4.54777
1	Choice	Costaria	24.96	23.34	0.935096	0.0374638	3.74638
2	Choice	Costaria	33.14	34.03	1.02686	0.0309854	3.09854
3	Choice	Costaria	31.131	28.165	0.904725	0.0290619	2.90619
4	Choice	Costaria	25.78	25.052	0.971761	0.0376944	3.76944
5	Choice	Costaria	25.78	26.173	1.01524	0.0393811	3.93811
6	Choice	Costaria	17.852	17.602	0.985996	0.0552317	5.52317
7	Choice	Costaria	15.976	16.104	1.00801	0.0630954	6.30954
8	Choice	Costaria	22.415	22.569	1.00687	0.0449195	4.49195
9	Choice	Costaria	43.45	44.231	1.01797	0.0234286	2.34286
1	Choice	Ulva	3.258	3.247	0.996624	0.3059	30.59
2	Choice	Ulva	3.02	3.064	1.01457	0.33595	33.595
3	Choice	Ulva	3.065	2.687	0.876672	0.286027	28.6027
4	Choice	Ulva	2.78	2.797	1.00612	0.361912	36.1912
5	Choice	Ulva	4.297	4.231	0.98464	0.229146	22.9146
6	Choice	Ulva	1.847	1.948	1.05468	0.571025	57.1025
7	Choice	Ulva	3.244	3.167	0.976264	0.300944	30.0944
8	Choice	Ulva	3.345	3.399	1.01614	0.30378	30.378
9	Choice	Ulva	3.72	3.778	1.01559	0.273008	27.3008

## Sheet: Nereo-Sargassum-Agarum
Trial	Choice	Treatment	Mass-Start	Mass-End	Change	PercentChange
1	Choice	Nereo	13.9	14.57	-0.67	-4.82014
2	Choice	Nereo	16.71	17.22	-0.51	-3.05206
3	Choice	Nereo	18.43	19.54	-1.11	-6.02279
4	Choice	Nereo	17.04	17.67	-0.63	-3.69718
5	Choice	Nereo	17.27	17.77	-0.5	-2.89519
6	Choice	Nereo	16.64	17.14	-0.5	-3.00481
7	Choice	Nereo	16.95	17.6	-0.65	-3.83481
8	Choice	Nereo	21.16	22.13	-0.97	-4.58412
9	Choice	Nereo	21.35	22.1	-0.75	-3.51288
10	Choice	Nereo	21.39	22.04	-0.65	-3.0388
1	Choice	Sargassum	6	5.98	0.02	0.333333
2	Choice	Sargassum	6.99	6.96	0.03	0.429185
3	Choice	Sargassum	7.54	7.47	0.07	0.928382
4	Choice	Sargassum	12.04	11.23	0.81	6.72757
5	Choice	Sargassum	8.08	7.56	0.52	6.43564
6	Choice	Sargassum	12.31	11.98	0.33	2.68075
7	Choice	Sargassum	9.04	8.7	0.34	3.76106
8	Choice	Sargassum	12.31	12.16	0.15	1.21852
9	Choice	Sargassum	11.35	10.98	0.37	3.25991
10	Choice	Sargassum	13.8	13.36	0.44	3.18841
1	Choice	Agarum	8.45	8.52	-0.07	-0.828402
2	Choice	Agarum	11.3	11.04	0.26	2.30088
3	Choice	Agarum	15.73	15.51	0.22	1.3986
4	Choice	Agarum	7.38	7.45	-0.07	-0.948509
5	Choice	Agarum	8.52	8.6	-0.08	-0.938967
6	Choice	Agarum	9.21	9.38	-0.17	-1.84582
7	Choice	Agarum	11.43	11.51	-0.08	-0.699913
8	Choice	Agarum	7.65	7.84	-0.19	-2.48366
9	Choice	Agarum	8.28	8.42	-0.14	-1.69082
10	Choice	Agarum	9.17	9.2	-0.03	-0.327154

## Sheet: Nereo-Mazzaella-Ulva
Trial	Choice	Treatment	Mass-Start	Mass-End	Change	PercentChange
1	Choice	Nereo	13	13.54	-0.54	-4.15385
2	Choice	Nereo	15.71	16.18	-0.47	-2.99173
3	Choice	Nereo	21.23	22.33	-1.1	-5.18135
4	Choice	Nereo	13.67	14.3	-0.63	-4.60863
5	Choice	Nereo	19.44	19.97	-0.53	-2.72634
6	Choice	Nereo	31.98	32.78	-0.8	-2.50156
7	Choice	Nereo	25.62	26.35	-0.73	-2.84934
8	Choice	Nereo	27.15	27.17	-0.02	-0.0736648
9	Choice	Nereo	30.84	31.31	-0.47	-1.52399
10	Choice	Nereo	25.32	26.42	-1.1	-4.34439
1	Choice	Mazzaella	13.21	13.42	-0.21	-1.5897
2	Choice	Mazzaella	8.88	8.9	-0.02	-0.225225
3	Choice	Mazzaella	6.98	6.93	0.05	0.716332
4	Choice	Mazzaella	11.42	11.76	-0.34	-2.97723
5	Choice	Mazzaella	13.44	13.34	0.1	0.744048
6	Choice	Mazzaella	11.37	11.15	0.22	1.93492
7	Choice	Mazzaella	15.37	15.69	-0.32	-2.08198
8	Choice	Mazzaella	5.76	5.47	0.29	5.03472
9	Choice	Mazzaella	9.19	9.28	-0.09	-0.979325
10	Choice	Mazzaella	6.58	6.69	-0.11	-1.67173
1	Choice	Ulva	4.69	4.61	0.08	1.70576
2	Choice	Ulva	4.41	4.36	0.05	1.13379
3	Choice	Ulva	4.75	4.43	0.32	6.73684
4	Choice	Ulva	2.11	2.09	0.02	0.947867
5	Choice	Ulva	3.09	3.23	-0.14	-4.53074
6	Choice	Ulva	5.15	5.3	-0.15	-2.91262
7	Choice	Ulva	2.67	2.81	-0.14	-5.24345
8	Choice	Ulva	3.51	3.79	-0.28	-7.97721
9	Choice	Ulva	2.27	2.29	-0.02	-0.881057
10	Choice	Ulva	2.2	2.26	-0.06	-2.72727

## Sheet: Fresh-Aged
Trial	Choice	Treatment	MassStart	MassEnd	Change	PercentChange
1	Choice	Fresh	12.99	13.34	-0.35	-0.0269438
2	Choice	Fresh	13.69	14.04	-0.35	-0.0255661
3	Choice	Fresh	17.6	18.6	-1	-0.0568182
4	Choice	Fresh	18.95	19.76	-0.81	-0.0427441
5	Choice	Fresh	16.84	17.07	-0.23	-0.013658
6	Choice	Fresh	16.22	16.92	-0.7	-0.0431566
7	Choice	Fresh	14.76	15.38	-0.62	-0.0420054
8	Choice	Fresh	9.93	10.24	-0.31	-0.0312185
9	Choice	Fresh	20.43	21.22	-0.79	-0.0386686
10	Choice	Fresh	15.87	16.47	-0.6	-0.0378072
11	Choice	Fresh	17.44	18.11	-0.67	-0.0384174
1	Choice	Aged	14.8	14.63	0.17	0.0114865
2	Choice	Aged	14.42	14.36	0.06	0.00416089
3	Choice	Aged	19.07	19.11	-0.04	-0.00209754
4	Choice	Aged	17.53	17.43	0.1	0.00570451
5	Choice	Aged	16.4	16.32	0.08	0.00487805
6	Choice	Aged	15.52	15.68	-0.16	-0.0103093
7	Choice	Aged	13.88	13.71	0.17	0.0122478
8	Choice	Aged	14.29	14.26	0.03	0.00209937
9	Choice	Aged	19.3	19.7	-0.4	-0.0207254
10	Choice	Aged	18.89	19	-0.11	-0.00582319
11	Choice	Aged	18.61	18.63	-0.02	-0.00107469
